# Supplementary material for: Meta-SourceTracker: application of Bayesian source tracking to shotgun metagenomics
Source: PeerJ. 2020 Mar 24;8:e8783. doi: 10.7717/peerj.8783 (PMC7100590; doi:10.7717/peerj.8783)
Supplement: Table S2 [file peerj-08-8783-s002.xlsx]

## Sheet: Sheet1
Table S2	ENA Accession numbers used in the mSourceTracker analysis of ISS samples.
Soil environmental samples- Accession: PRJEB7626. BASE – Biomes of Australian Soil Environments
ERR671910	ERR671913	ERR671914	ERR671915	ERR671916	ERR671917	ERR671923	ERR671925
ERR671929	ERR671930	ERR671931	ERR671932	ERR671934	ERR671935	ERR671936	ERR671939
ERR687883	ERR687885	ERR687887	ERR687890	ERR687892	ERR687895	ERR687896	ERR687897
Gut evironmental samples- Accession: PRJEB6092. Metagenome Fecal Microbiota
ERR505083	ERR505084	ERR505085	ERR505086	ERR505087	ERR505088	ERR505089	ERR505090
ERR505091	ERR505092	ERR505093	ERR505094	ERR505095	ERR505096	ERR505097	ERR505098
ERR505099	ERR505100	ERR505101	ERR505102	ERR505103	ERR505104	ERR505105	ERR505106
Skin samples- Accession: PRJNA277905. Human Skin Microbiome Metagenome
SRR1950687	SRR1950688	SRR1950689	SRR1950694	SRR1950695	SRR1950701	SRR1950711	SRR1950716
SRR1950717	SRR1950724	SRR1950729	SRR1950730	SRR1950731	SRR1950736	SRR1950744	SRR1950747
SRR1950748	SRR1950749	SRR1950758	SRR1950762	SRR1950768	SRR1950769	SRR1950776	SRR1950777
ISS environmental samples: Accession. PRJNA438545. ISS Metagenomes
SRR6853342	SRR6853343	SRR6853344	SRR6853345	SRR6853346	SRR6853347	SRR6853348	SRR6853349
SRR6853350	SRR6853351
Freshwater environmental samples- Accession: PRJNA254927. Freshwater habitats river Metagenome
